# Supplementary material
Source: PubMed Central journal article supplement (PMC7616931)
Supplement: EMS117003-supplement-Supporting_Information.pdf [file EMS117003-supplement-Supporting_Information.pdf]

## Supporting Information

### **Metal-Ion Modulated Structural Transformation of Amyloid-Like Dipeptide Supramolecular Self-Assembly**

*Wei Ji,<sup>†,‡</sup> Chengqian Yuan,<sup>§,‡</sup> Shai Zilberzwige-Tal,<sup>†</sup> Ruirui Xing,<sup>§</sup> Priyadarshi Chakraborty,<sup>†</sup> Kai Tao,<sup>†</sup> Sharon Gilead,<sup>†</sup> Xuehai Yan,<sup>§,\*</sup> and Ehud Gazit<sup>†,#,\*</sup>*

<sup>†</sup>Department of Molecular Microbiology and Biotechnology, George S. Wise Faculty of Life Sciences, Tel Aviv University, Tel Aviv 6997801, Israel.

E-mail: ehudg@post.tau.ac.il

<sup>§</sup>State Key Laboratory of Biochemical Engineering, Institute of Process Engineering, Chinese Academy of Sciences, 100190, Beijing, China.

E-mail: yanxh@ipe.ac.cn

<sup>#</sup>Department of Materials Science and Engineering, Iby and Aladar Fleischman Faculty of Engineering, Tel Aviv University, Tel Aviv 6997801, Israel.

<sup>‡</sup>These authors contributed equally to this work

<sup>\*</sup>These authors are corresponding author

## Table of Contents

|                           |     |
|---------------------------|-----|
| <b>Figure S1</b> .....    | S3  |
| <b>Figure S2-S3</b> ..... | S4  |
| <b>Figure S4-S5</b> ..... | S5  |
| <b>Figure S6</b> .....    | S6  |
| <b>Figure S7</b> .....    | S7  |
| <b>Figure S8</b> .....    | S8  |
| <b>Figure S9</b> .....    | S9  |
| <b>Figure S10</b> .....   | S10 |
| <b>Figure S11</b> .....   | S11 |
| <b>Figure S12</b> .....   | S12 |
| <b>Figure S13</b> .....   | S13 |

**Materials:** All the solvents and chemicals are commercially available. Chemicals were used without further purification. Water was processed using a Millipore purification system (Darmstadt, Germany) with a minimum resistivity of 18.2 MΩ cm. Sodium chloride, potassium chloride, zinc chloride, copper (II) chloride, iron (III) chloride, and aluminum chloride were purchased from Sigma, and ultrapure water was obtained from Biological Industries. Fmoc-modified diphenylalanine (FmocFF) was purchased from Bachem at a purity level of >98%.

**NMR:**  $^1\text{H}$  and  $^{13}\text{C}$  NMR spectra were recorded in deuterated solvent on a Bruker Advance 400 MHz spectrometer. The  $^1\text{H}$  NMR chemical shifts ( $\delta$ ) are given in ppm, referring to internal standard tetramethylsilane (TMS). All coupling constants ( $J$ ) are given in Hz. FmocFF:  $^1\text{H}$  NMR (400 MHz, DMSO- $d_6$ )  $\delta$ : 12.67 (s, 1H), 8.20 (d,  $J = 8.0$  Hz, 1H), 7.80 (d,  $J = 4.0$  Hz, 2H), 7.48-7.57 (m, 3H), 7.31-7.34 (m, 2H), 7.08-7.21 (m, 12H), 4.38-4.43 (m, 1H), 4.17-4.23 (m, 1H), 4.01-4.08 (m, 3H), 2.99-3.03 (dd,  $J_1 = 4.0$  Hz,  $J_2 = 12.0$  Hz, 1H), 2.85-2.92 (m, 1H), 2.60-2.69 (m, 1H).  $^{13}\text{C}$  NMR (100 MHz, DMSO- $d_6$ )  $\delta$ : 173.0, 171.9, 156.0, 144.1, 144.0, 140.9, 138.4, 137.6, 129.5, 129.4, 128.5, 128.3, 127.9, 127.3, 126.7, 126.5, 125.7, 125.6, 120.4, 66.7, 65.9, 56.28, 53.79, 46.88, 37.3, 37.0, 23.1. MS (ESI) calcd for  $\text{C}_{33}\text{H}_{30}\text{N}_2\text{O}_5$   $[\text{M}+\text{H}]^+$ , 535.2; found, 535.6.

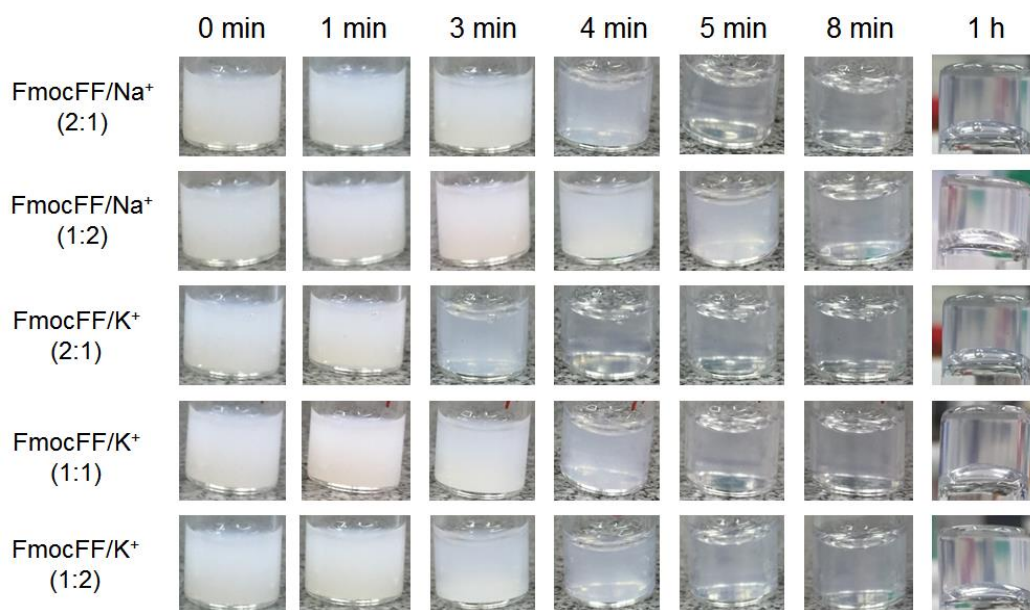

Figure S1. Time lapse images of FmocFF/Na<sup>+</sup> and FmocFF/K<sup>+</sup> at various molar ratios (2:1, 1:1, 1:2) in 2% DMSO in H<sub>2</sub>O (v/v).

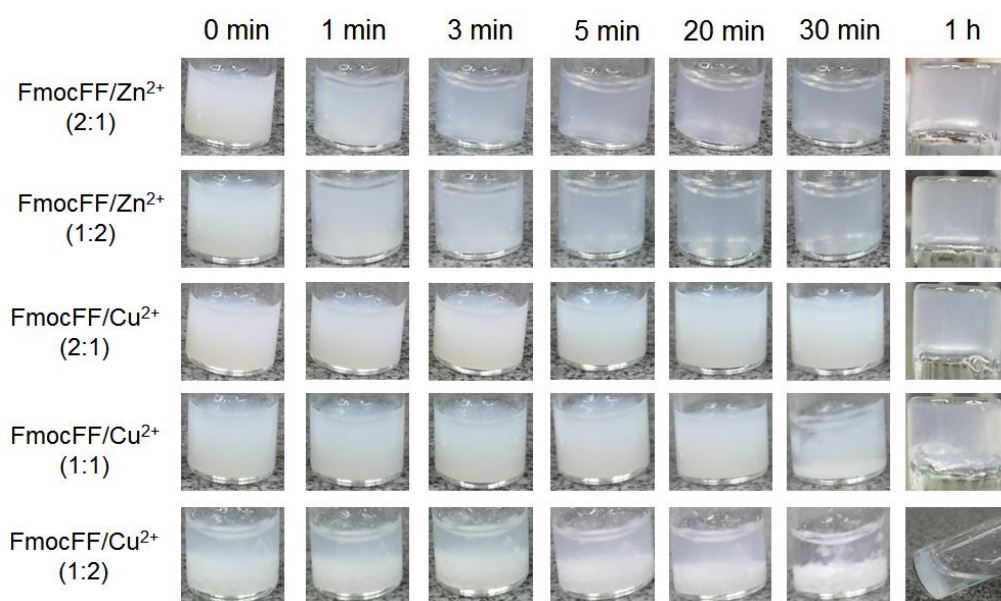

Figure S2. Time lapse images of FmocFF/Zn<sup>2+</sup> and FmocFF/Cu<sup>2+</sup> at various molar ratios (2:1, 1:1, 1:2) in 2% DMSO in H<sub>2</sub>O (v/v). The FmocFF/Zn<sup>2+</sup> (1:2) can form gel but not for FmocFF/Cu<sup>2+</sup> (1:2), which may be ascribed to the good binding ability of Zn<sup>2+</sup> with water molecules.<sup>1</sup> In addition, the size of FmocFF/Zn<sup>2+</sup> compact fibrils are smaller that benefit the hydrogelation.

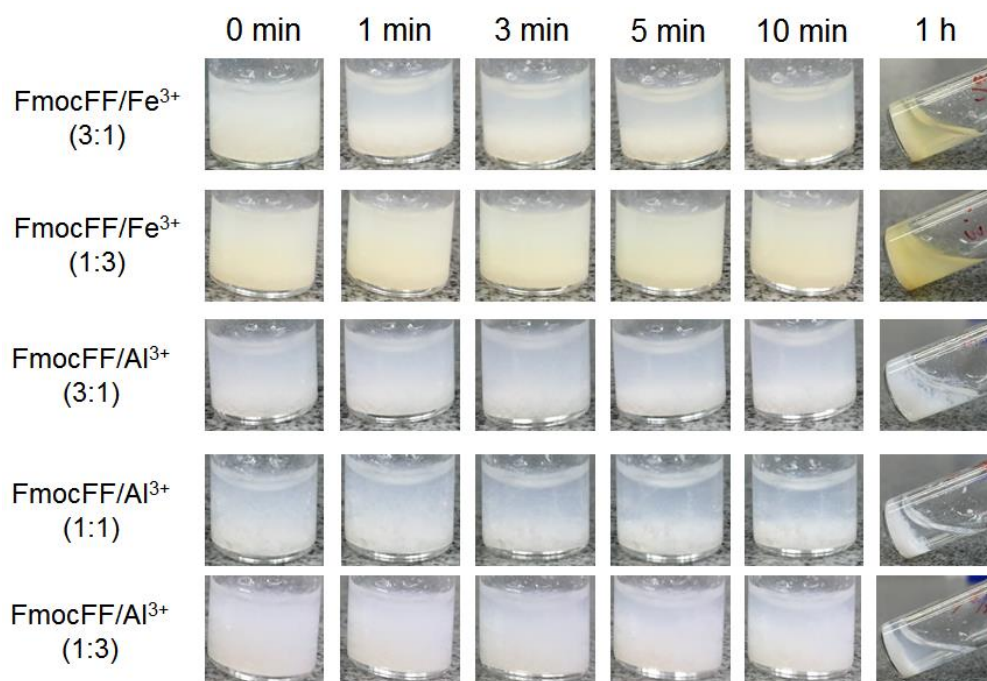

Figure S3. Time lapse images of FmocFF/Fe<sup>3+</sup> and FmocFF/Al<sup>3+</sup> at various molar ratios (3:1, 1:1, 1:3) in 2% DMSO in H<sub>2</sub>O (v/v).

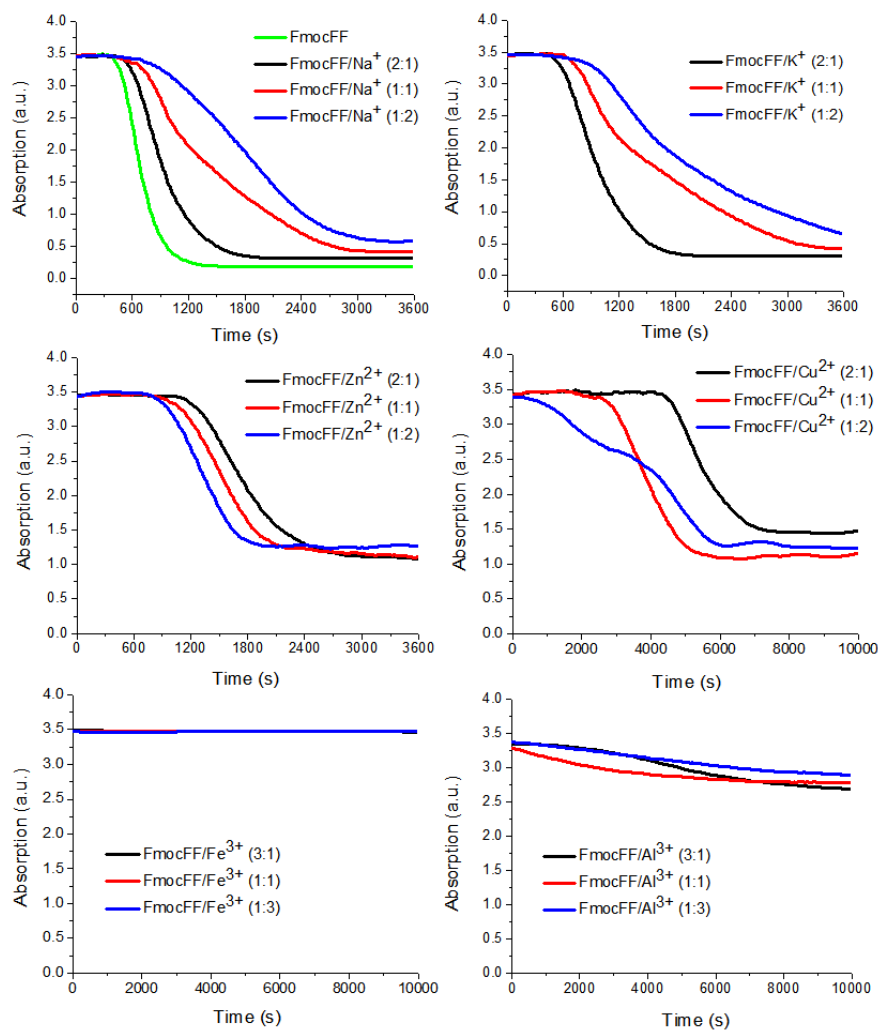

Figure S4. Turbidity measured at 405 nm over time for FmocFF and FmocFF/metal ions solutions in 2% DMSO in H<sub>2</sub>O (v/v).

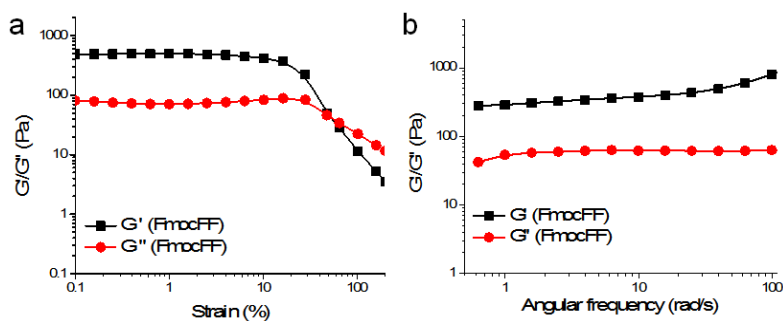

Figure S5. (a) Rheological measurements of strain sweep of the FmocFF hydrogel at a constant frequency of 1 Hz. (b) Rheological measurements of dynamic frequency sweep of the FmocFF hydrogel at a strain of 0.1% over a range of 0.1-100 rad<sup>-1</sup>.

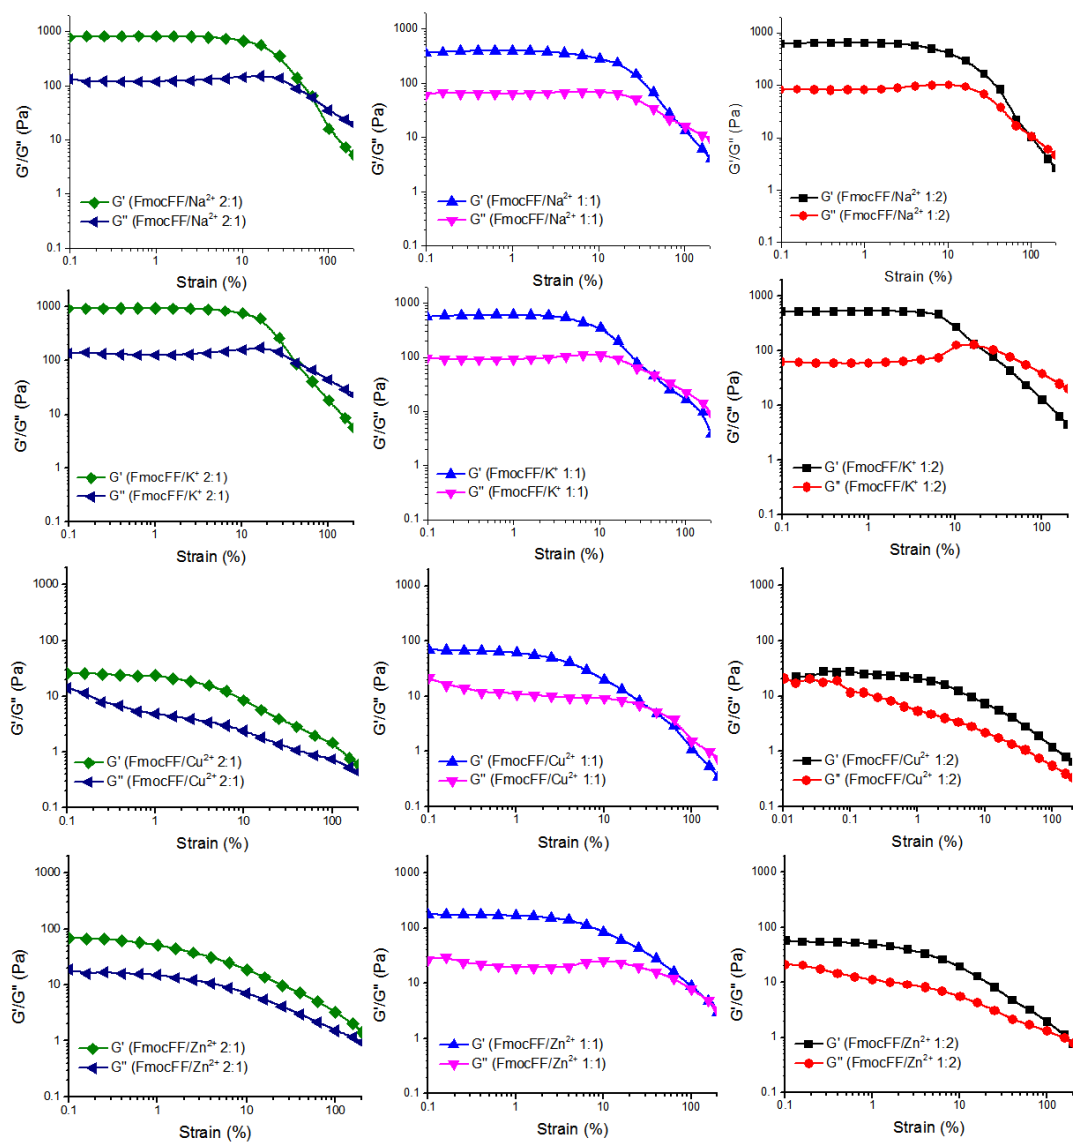

Figure S6. Rheological strain sweep measurements of different metallohydrogels at a constant frequency of 1 Hz.

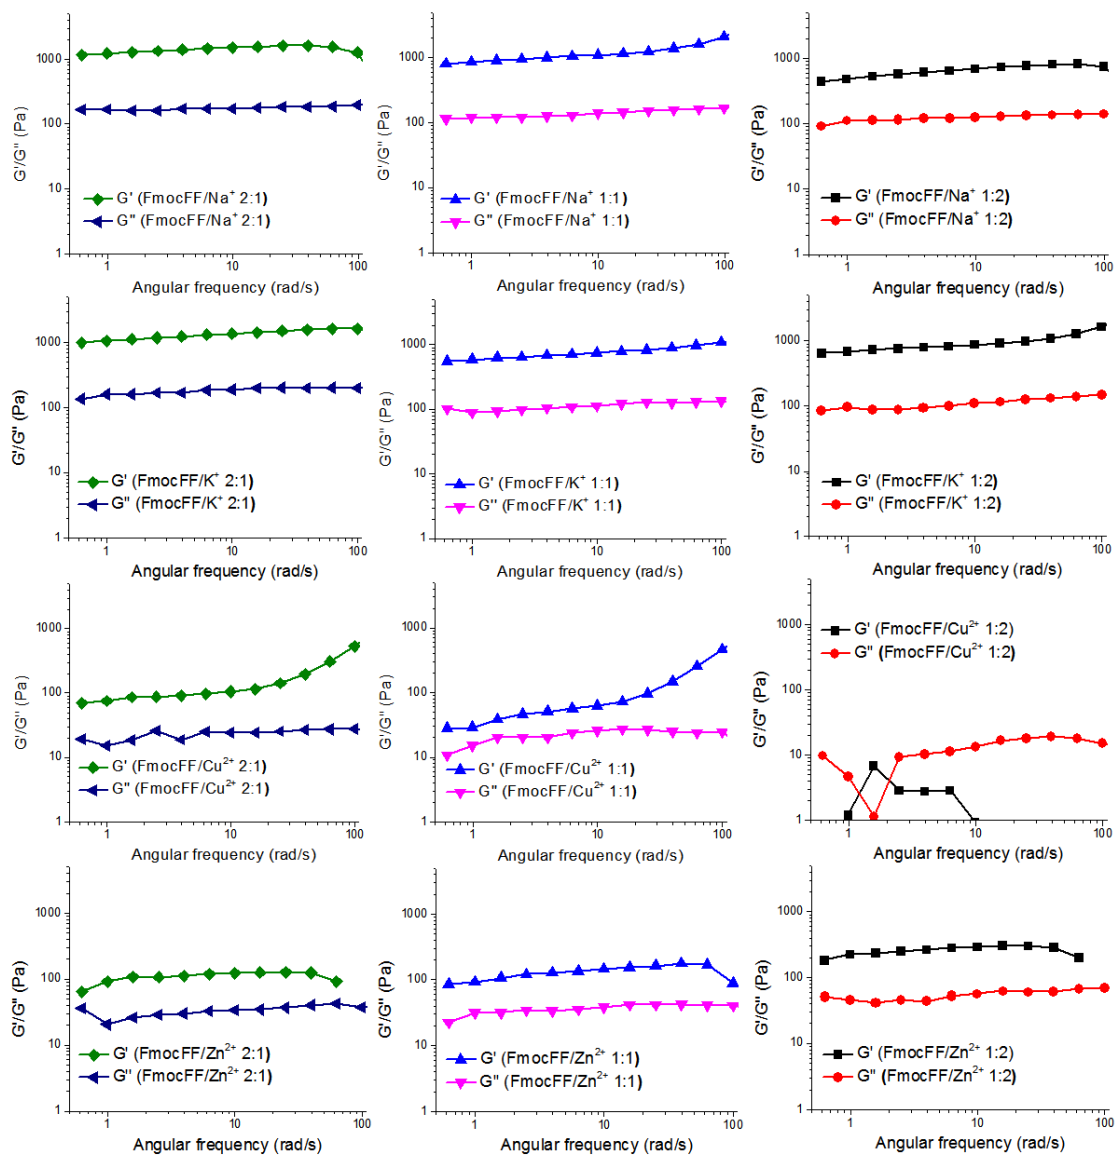

Figure S7. Rheological dynamic frequency sweep measurements of different metallohydrogels at a strain of 0.1% over a range of 0.1-100  $\text{rads}^{-1}$ .



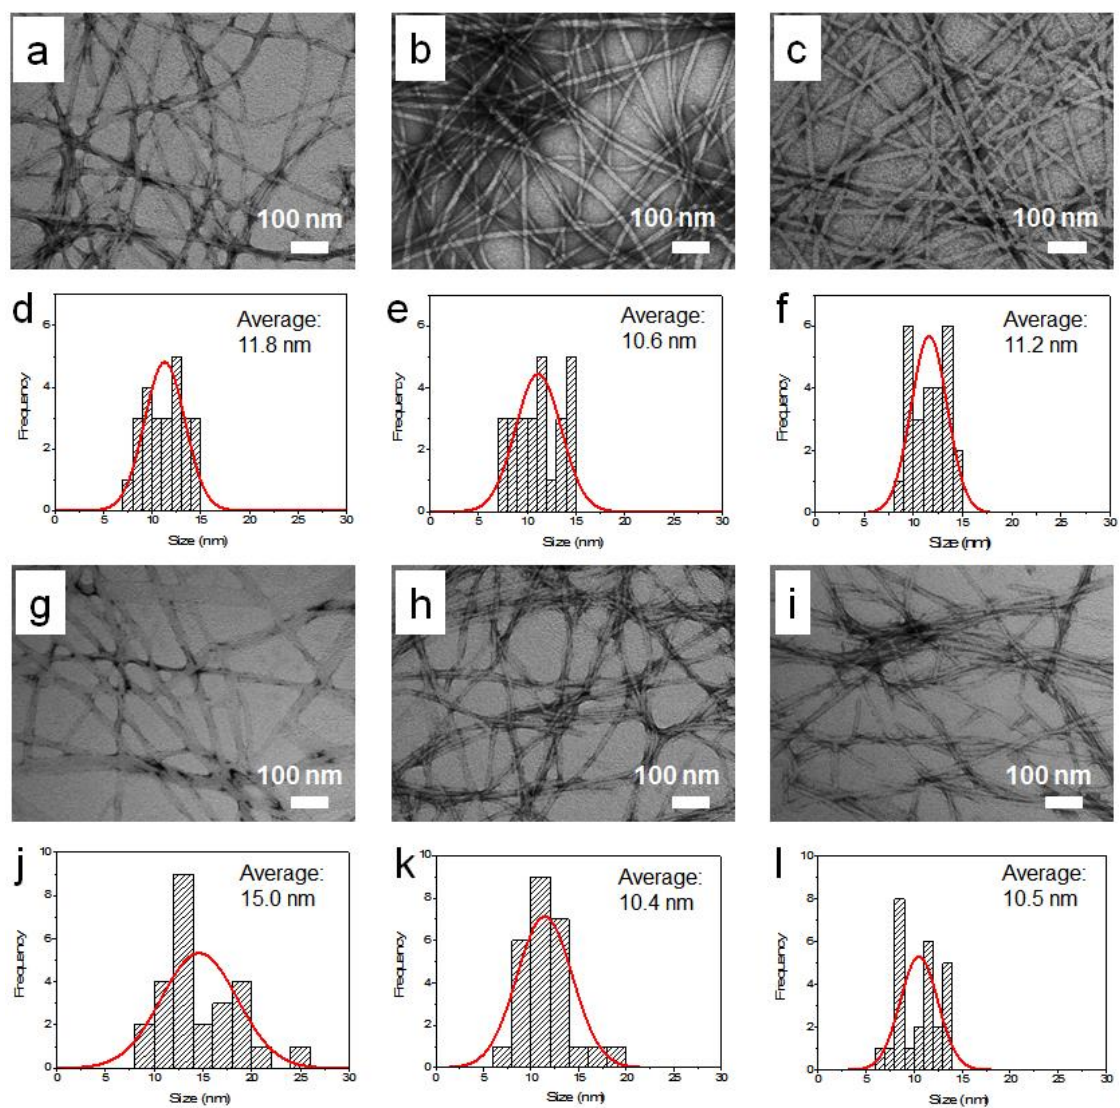

Figure S8. (a-c, g-i) TEM images and (d-f, j-l) average size distribution histogram of (a, d) FmocFF/Na<sup>+</sup> (2:1), (b, e) FmocFF/Na<sup>+</sup> (1:1), (c, f) FmocFF/Na<sup>+</sup> (1:2), (g, j) FmocFF/K<sup>+</sup> (2:1), (h, k) FmocFF/K<sup>+</sup> (1:1), and (i, l) FmocFF/K<sup>+</sup> (1:2) in 2% DMSO in H<sub>2</sub>O (v/v) at a concentration of 2 mg/mL. Scale bar is 100 nm.



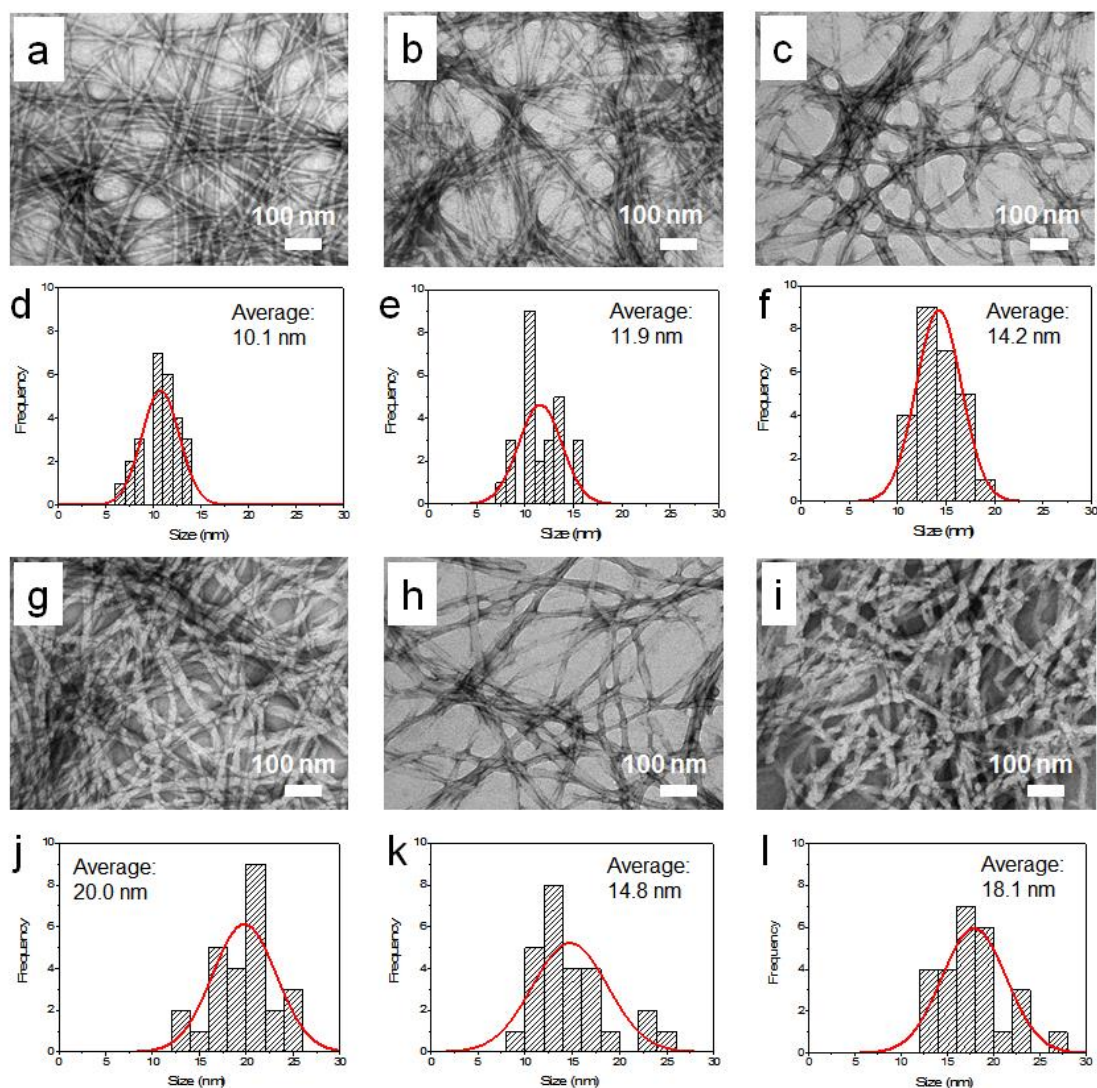

Figure S9. (a-c, g-i) TEM images and (d-f, j-l) average size distribution histogram of (a, d) FmocFF/Zn<sup>2+</sup> (2:1), (b, e) FmocFF/Zn<sup>2+</sup> (1:1), (c, f) FmocFF/Zn<sup>2+</sup> (1:2), (g, j) FmocFF/Cu<sup>2+</sup> (2:1), (h, k) FmocFF/Cu<sup>2+</sup> (1:1), and (i, l) FmocFF/Cu<sup>2+</sup> (1:2) in 2% DMSO in H<sub>2</sub>O (v/v) at a concentration of 2 mg/mL. Scale bar is 100 nm.

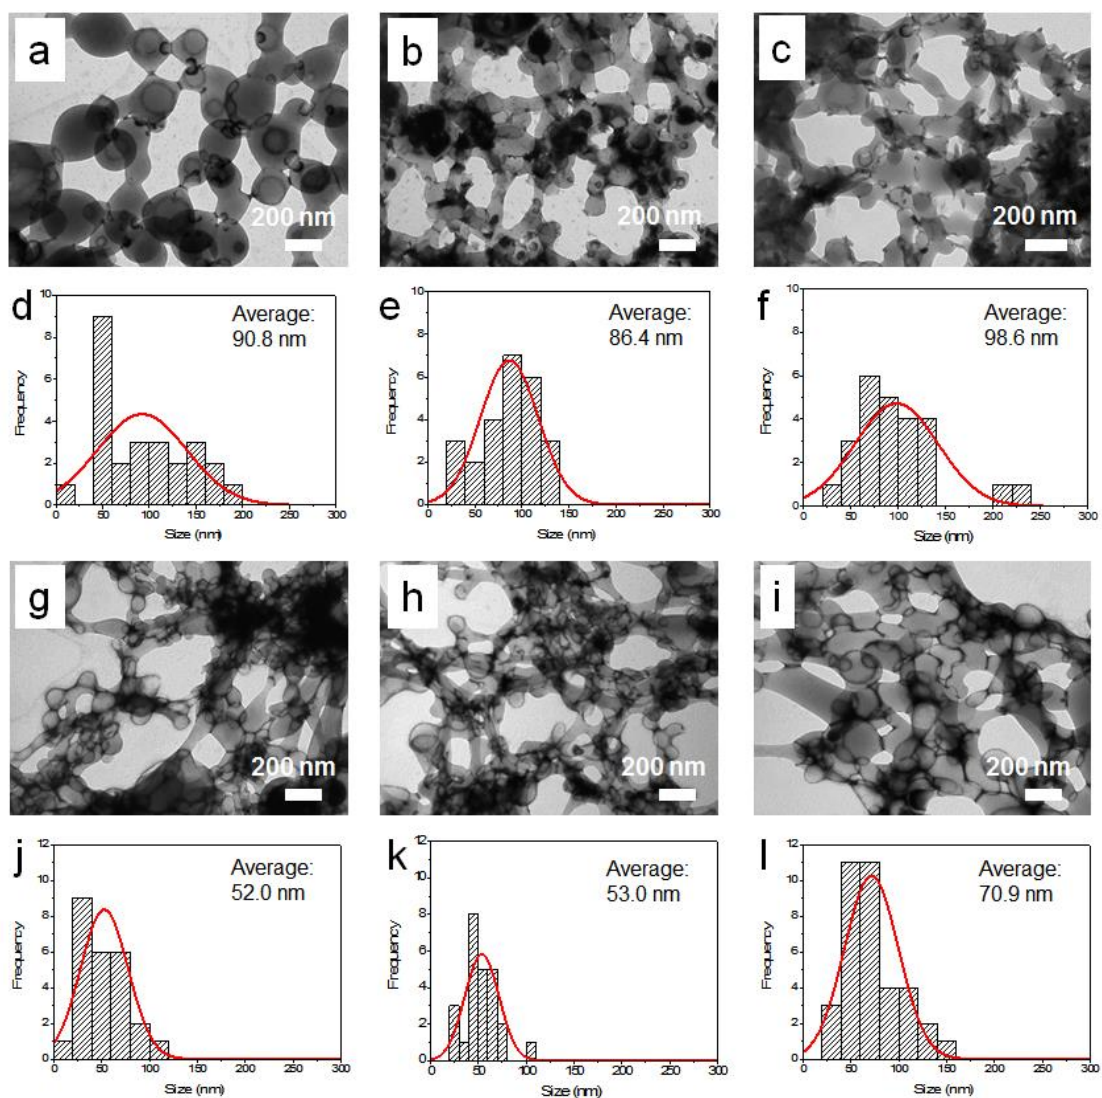

Figure S10. (a-c, g-i) TEM images and (d-f, j-l) average size distribution histogram of (a, d) FmocFF/Fe<sup>3+</sup> (3:1), (b, e) FmocFF/Fe<sup>3+</sup> (1:1), (c, f) FmocFF/Fe<sup>3+</sup> (1:3), (g, j) FmocFF/Al<sup>3+</sup> (3:1), (h, k) FmocFF/Al<sup>3+</sup> (1:1), and (i, l) FmocFF/Al<sup>3+</sup> (1:3) in 2% DMSO H<sub>2</sub>O (v/v) at a concentration of 2 mg/mL. Scale bar is 200 nm.



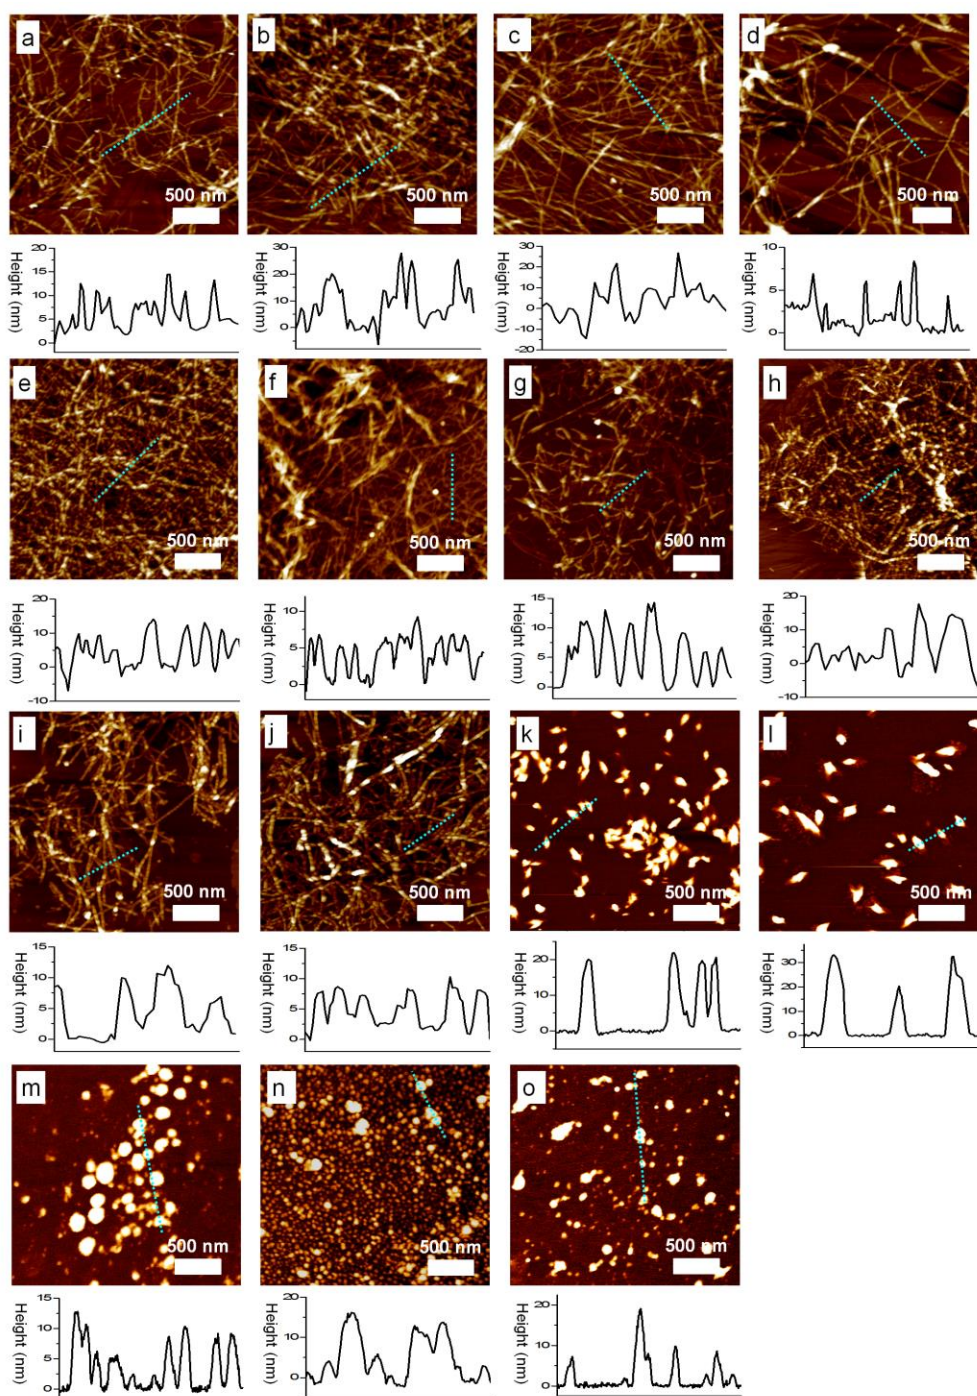

Figure S11. AFM images (top) and height distribution (bottom) of (a) FmocFF/Na<sup>+</sup> (2:1), (b) FmocFF/Na<sup>+</sup> (1:2), (c) FmocFF/K<sup>+</sup> (2:1), (d) FmocFF/K<sup>+</sup> (1:1), (e) FmocFF/K<sup>+</sup> (1:2), (f) FmocFF/Zn<sup>2+</sup> (2:1), (g) FmocFF/Zn<sup>2+</sup> (1:2), (h) FmocFF/Cu<sup>2+</sup> (2:1), (i) FmocFF/Cu<sup>2+</sup> (1:1), (j) FmocFF/Cu<sup>2+</sup> (1:2), (k) FmocFF/Fe<sup>3+</sup> (3:1), (l) FmocFF/Fe<sup>3+</sup> (1:3), (m) FmocFF/Al<sup>3+</sup> (3:1), (n) FmocFF/Al<sup>3+</sup> (1:1), and (o) FmocFF/Al<sup>3+</sup> (1:3) in 2% DMSO in H<sub>2</sub>O (v/v) at a concentration of 2 mg/mL. Scale bar is 500 nm.

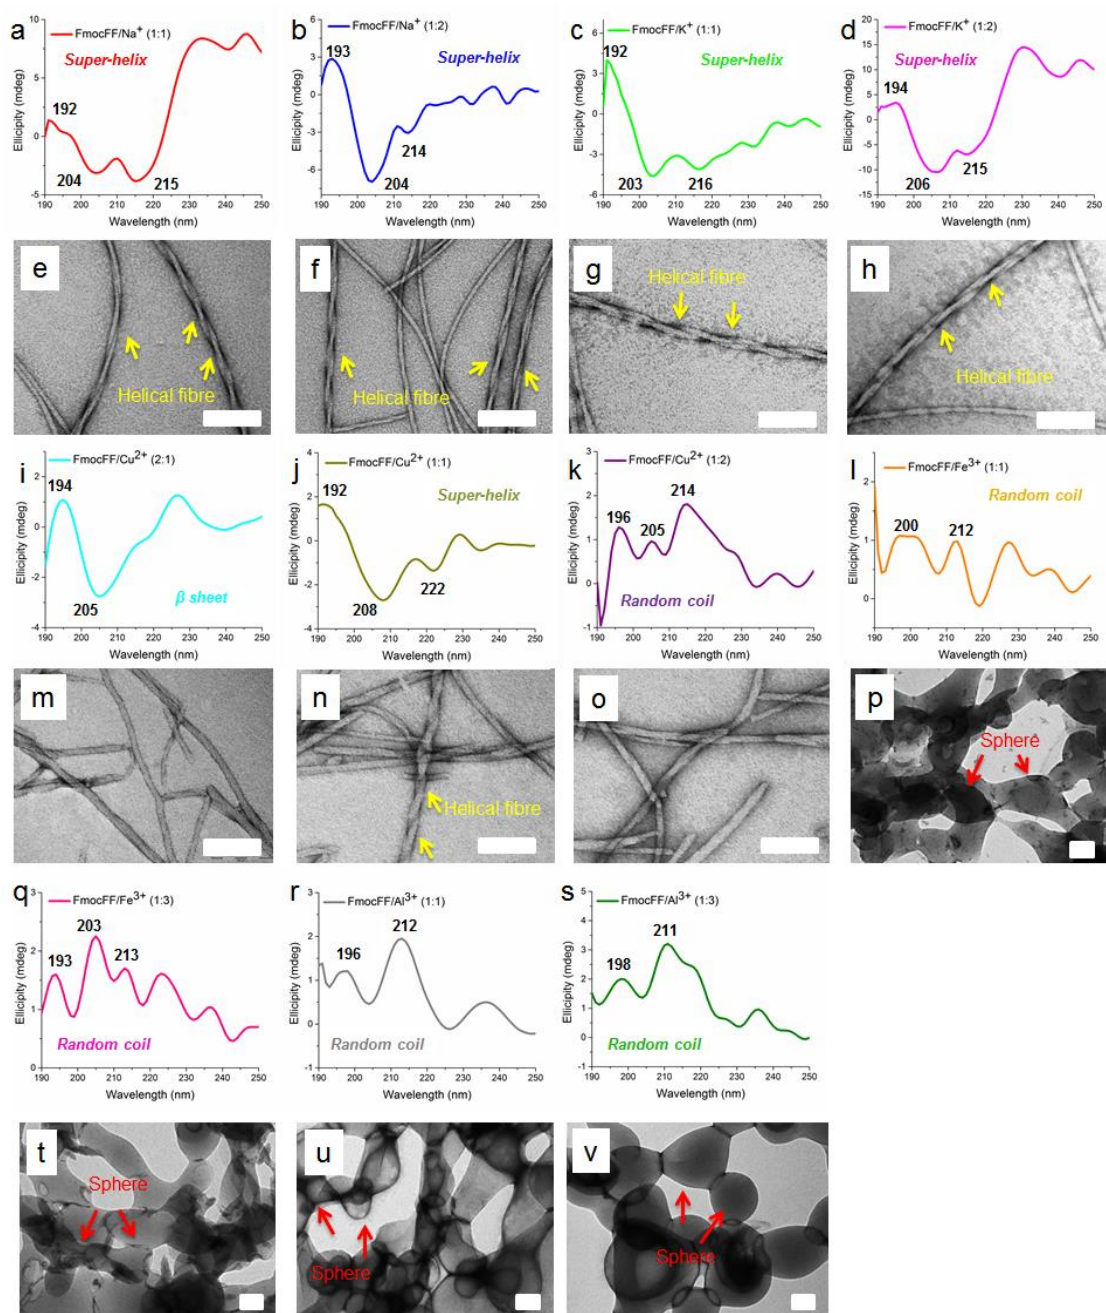

Figure S12. (a-d, i-l, q-s) CD spectra and e-h, m-p, t-v) high-resolution TEM images of FmocFF with different metal ions in 2% DMSO in H<sub>2</sub>O (v/v) at a concentration of 2 mg/mL. (a, e) FmocFF/Na<sup>+</sup> (1:1), (b, f) FmocFF/Na<sup>+</sup> (1:2), (c, g) FmocFF/K<sup>+</sup> (1:1), (d, h) FmocFF/K<sup>+</sup> (1:2), (i, m) FmocFF/Cu<sup>2+</sup> (2:1), (j, n) FmocFF/Cu<sup>2+</sup> (1:1), (k, o) FmocFF/Cu<sup>2+</sup> (1:2), (l, p) FmocFF/Fe<sup>3+</sup> (1:1), (q, t) FmocFF/Fe<sup>3+</sup> (1:3), (r, u) FmocFF/Al<sup>3+</sup> (1:1), and (s, v) FmocFF/Al<sup>3+</sup> (1:3). Scale bar is 50 nm.

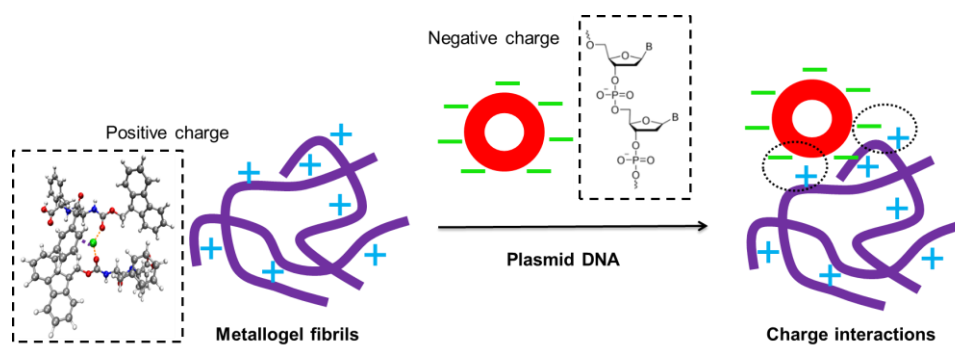

Figure S13 The electrostatic interactions between positively charged metallogel fibrils and negatively charged plasmid DNA.

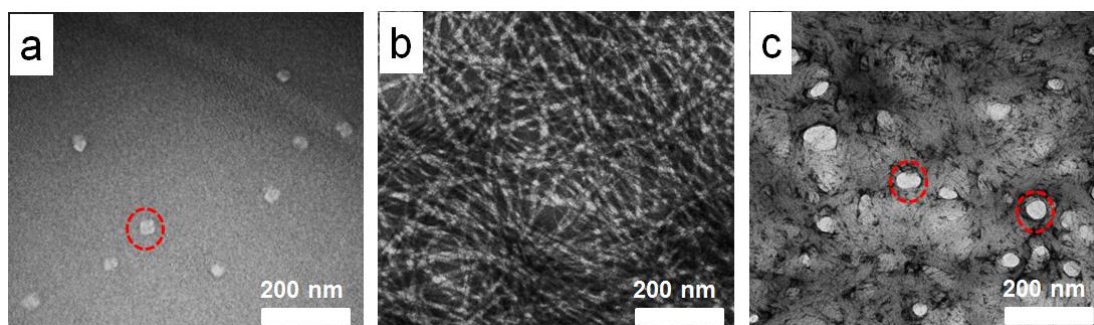

Figure S14 (a) TEM image of plasmid DNA. (b-c) TEM images of DNA binding to the (b) FmocFF and (c) FmocFF/Zn<sup>2+</sup> 1:1 hydrogels after addition of DNA for 0.5 hour. Scale bar is 200 nm.

## Reference

1. Hartmann, M.; Clark, Timothy.; Eldik, R. Hydration and Water Exchange of Zinc(II) Ions. Application of Density Functional Theory. *J. Am. Chem. Soc.* **1997**, *119*, 7843-7850.
